# Supplementary material for: Power Factor Compensation in Non-Sinusoidal Circuits Using Geometric Algebra and Evolutionary Algorithms
Source: Preprints.org preprint supplement (doi:10.20944/preprints201902.0181.v1), 2019-02-19
Supplement: Supplementary file 1 [file supplementary]

Article

# Quadrature current compensation in non-sinusoidal circuits using geometric algebra and evolutionary algorithms

Francisco G. Montoya <sup>1\*</sup> , Alfredo Alcayde <sup>1</sup>, Francisco M. Arrabal-Campos <sup>1</sup>, Raul Baños <sup>1</sup>

<sup>1</sup> Dept. of Engineering, University of Almeria, Spain; pagilm@ual.es aalcayde@ual.es fmarrabal@ual.es and rbanos@ual.es

\* Correspondence: pagilm@ual.es; Tel.: +34 950 214501

Academic Editor: name

Version February 7, 2019 submitted to Energies

**Abstract:** Non-linear loads in circuits cause the appearance of harmonic disturbances both in voltage and current. In order to minimize the effects of these disturbances and, therefore, to control over the flow of electricity between the source and the load, they are often used passive or active filters. Nevertheless, determining the type of filter and the characteristics of their elements is not a trivial task. In fact, the development of algorithms for calculating the parameters of filters is still an open question. This paper analyzes the use of genetic algorithms to maximize the power factor compensation in non-sinusoidal circuits using passive filters, while concepts of geometric algebra theory are used to represent the flow of power in the circuits. According to the results obtained in different case studies, it can be concluded that the genetic algorithm obtain high quality solutions that could be generalized to similar problems of any dimension.

**Keywords:** Power factor compensation; non-sinusoidal circuits; geometric algebra; evolutionary algorithms.

## 1. Introduction

The introduction of distributed generation and microgrids in power networks allow an efficient energy management and integration with renewable energy sources [1]. However, these grids include an increasing number of power electronic devices and non-linear electronic loads, such as power inverters, cycloconverters, speed drives, batteries, household appliances, among others. These non-linear loads increase the harmonic disturbances both in voltage and current, then causing detrimental effects to the supply system and user equipment [2]. As consequence, these grids are seriously affected by events that degrade the power quality [3], and provoke excessive heating, protection faults and inefficiencies in the transmission of energy [4], it becomes a critical task to determine precisely the electrical energy balances on the microgrid.

Different authors have presented models and theories in the past [5–7], but while all them coincide in the study of the sinusoidal case, there are some controversy in the analysis of non-sinusoidal systems with a high harmonic content, such as modern microgrids. In particular, well-known theories such as those proposed by Budeanu [8] and Fryze [9], have been questioned by different authors after demonstrating inconsistency and errors [10–12]. Therefore, it is important to investigate how to improve the compensation of the power factor in non-sinusoidal systems in presence of harmonics. Some investigations have highlighted that algorithms for calculating the parameters of filters has rarely been discussed [13], although in recent years some authors have applied computational optimization methods, including meta-heuristic approaches for optimizing filter parameters in circuits having

harmonic distortion [2,14–16]. More specifically, genetic algorithms have been successfully applied in [17–19].

In this paper, an evolutionary algorithm is used to optimize the type and characteristics of passive filters for power factor compensation. The rest of the paper is organized as follows: Section 2 introduces some basic ideas about geometric algebra and its application to power systems. Section 3 describes the problem at hand and the genetic algorithm used as solution method. Section 4 presents the empirical study, while the main conclusions obtained are detailed in Section 5.

## 2. Geometric algebra and power systems

Traditionally, electrical engineers have been taught to solve sinusoidal electrical circuits using complex number algebra, exactly as Steinmetz theory [20] introduced in the 19th century. It stated that differential equations in time domain can be transformed into algebra equations in complex domain. Under these assumptions, the apparent power can be expressed as:

$$\vec{S} = \vec{U}\vec{I}^* = P + jQ \quad (1)$$

where  $P$  is the active power,  $Q$  is the reactive power and  $j$  is unit imaginary number.

The limitations of the algebra of complex numbers and the impossibility to apply the principle of conservation of energy to the apparent power quantity [21], has caused that some researchers propose alternative circuit analysis techniques, including those based on geometric algebra [22].

### 2.1. Basic definitions of geometric algebra

Geometric algebra has its origins in the work of Clifford and Grassman in the 19th century and is considered as a unified language for mathematics and physics. It is based on the notion of an invertible product of vectors that captures the geometric relationship between two vectors, i.e., their relative magnitudes and the angle between them [23]. Some investigations have defined the properties of geometric algebra [24,25] applied to physics and engineering. Traditional concepts such as vector, spinor, complex numbers or quaternions are naturally explained as members of subspaces in geometric algebra. It can be easily extended in any number of dimensions, being this one of its main strengths. Because these are geometrical objects, they all have direction, sense and magnitude. The basics of GA properties are based on well established definitions around vectors. For example, a vector  $\vec{a} = \alpha_1 \vec{e}_1 + \alpha_2 \vec{e}_2$  (a segment with direction and sense) can be multiplied by a vector  $\vec{b} = \beta_1 \vec{e}_1 + \beta_2 \vec{e}_2$  in different ways, so the result has different meanings. In (2), the inner product is defined and the result is a scalar.

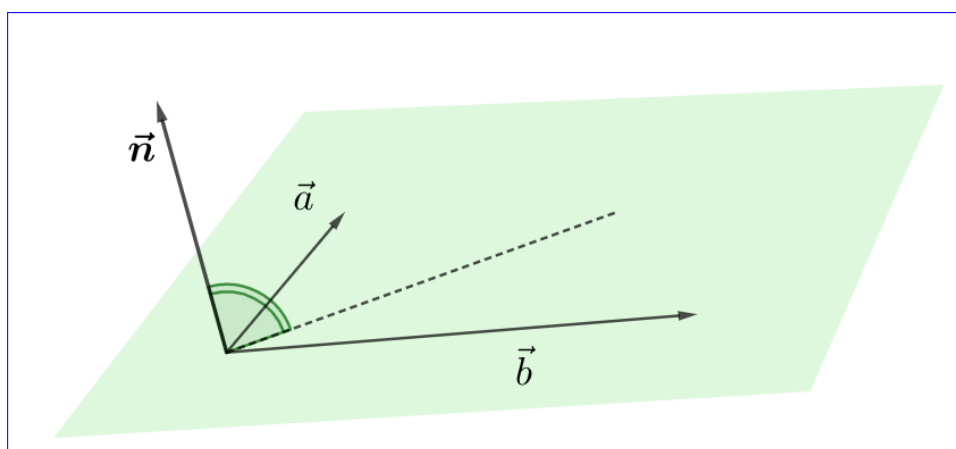

**Figure 1.** Outer product of vectors  $\vec{a}$  and  $\vec{b}$ . The result is a vector  $\vec{n}$ , perpendicular to the plane formed by  $\vec{a}$  and  $\vec{b}$







power theories like Czarnecki's based their power factor definition on the concept of apparent power  $S$ , so it leads to different power factor results in non-sinusoidal situations.

### 3. Problem description and solution strategy

This section describes the proposed problem in this research and details the characteristics of the genetic algorithm used to solve it.

#### 3.1. Problem description

Power systems operating under harmonic distortion must be optimized to reduce power losses and improve power quality [36,37]. Whether the system is linear or non-linear, it is necessary to provide reactances in parallel with the load in order to reduce these harmonics. The typical design of compensators is based on the knowledge of the susceptances of the system to different frequencies [38], something that is not easy to achieve when you have highly distorted systems. The main objective of non active power compensation is to minimize the source RMS current [5]. However, it is not a trivial task since it involves to determine which type of filter and characteristics of their components is more suitable for compensation purposes in a given circuit. For example, a capacitor with an optimal value connected in parallel to the load is an easy solution but this does not produce the absolute minimum of the distortion power [39], while other alternatives could improve it.

Some studies have highlighted that algorithms for calculating the parameters of filters has not been studied in detail [13], although some authors have implemented optimization algorithms for optimizing the configuration of the filters in circuits having harmonic distortion. For example, in [15] it was proposed a genetic algorithm to minimize current total harmonic distortion using LC passive harmonic filters. Other recent studies have applied swarm intelligence methods to comparatively evaluate single-tuned, double-tuned, triple-tuned, damped-double tuned and C-type filters in order to improve the loading capability of a set of transformers under non-sinusoidal conditions [16]. In addition to the use of passive filters, some studies proposed algorithms for estimating the optimal parameters of active and hybrid filters. For example, in [2] it was proposed the use of direct neural intelligent techniques to improve performance of a shunt active filters. In other recent studies, it has been proposed the use of differential evolution (DE) algorithms to optimize the parameters of hybrid filters (combining active and passive filters) in order to minimize harmonic pollution [14]. The problem to be solved ~~consists on determining the~~ involves the determination of the most suitable type of passive filter and ~~the its~~ parameters to minimize the source RMS current  $I_s$  in order to get the optimal value  $I_{scp}$ .

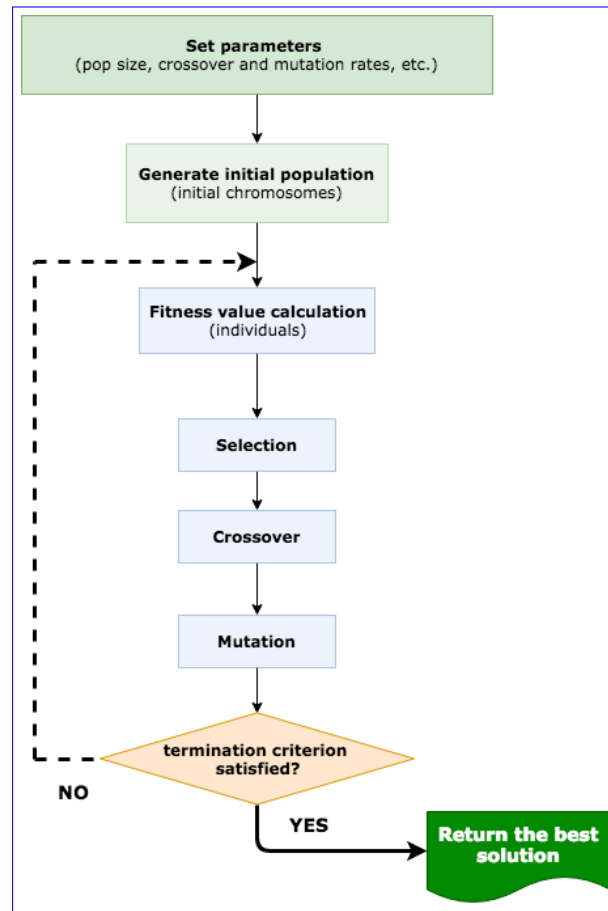

Figure 3. Flowchart of the genetic algorithm.

### 3.2. *Solution approach*

Genetic algorithms are optimization methods based on principles of natural selection and genetics [40]. Figure 3 shows the flowchart describing the operation of the genetic algorithm. It consists of a set (population) of solutions, each of which is called individual or phenotype, that evolve to reach solutions of high quality in terms of a fitness function. As an initialization step, genetic algorithm randomly generates a set of solutions to a problem (a population of genomes). ~~Each individual is often represented by strings of 0s and 1s, called chromosomes or genotype. As Figure 4 shows, each individual is represented by a string of real numbers. Specifically, the data structure of each individual consists of three possible values for inductors  $L$  (Henry) and three possible values for capacitors  $C$  (Farad). All or some of these values will be considered in the optimization process depending on the filter choosed, which will be specified in the FT field (filter type), as described below. The actual values that can be assigned to inductors and capacitors are preset between two limits (upper and lower), so that the search space of the evolutionary algorithm is limited within reasonable margins.~~ After calculating the fitness values for all solutions in a current population, the individuals for mating pool are selected using the operator of reproduction according to a given fitness function defined for the problem to be solved. In our problem the fitness function is

$$\min f(L, C) = I_s(L, C) \quad (16)$$

where  $I_s$  is the source current calculated according to geometric algebra operations. These selection strategies aim to introduce a certain degree of elitism in the population. These solutions evolve by applying mutation and crossover operators that modify the genotype of the individuals. Offspring



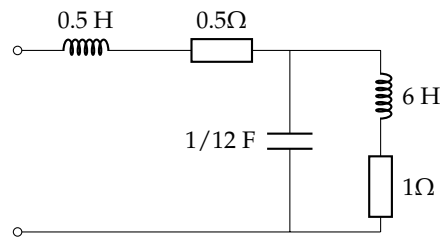

(a) Circuit proposed by Czarnecki

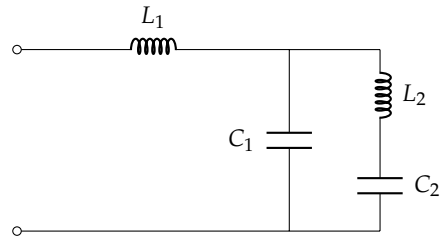

(b) Compensator layout

**Figure 5.** Load and compensator used by Czarnecki [in \[39\]](#).

- Castro-Núñez and Castro-Puche's case study [\[22\]\[26\]](#): This example ([already studied by Czarnecki](#)) consists of a circuit with a highly distorted voltage source [with fundamental plus 2 harmonics](#) and a linear load, being the voltage **multivector**:-

$$u = -100e_2 + \frac{100}{11} \bigwedge_{i=1, i \neq 2}^{12} e_i + \frac{100}{13} \bigwedge_{i=1, i \neq 2}^{14} e_i$$

$$\underline{u(t) = 100\sqrt{2} \sin t + \frac{100}{11} \sqrt{2} \sin 11t + \frac{100}{13} \sqrt{2} \sin 13t} \quad (19)$$

with  $\|I_s\| = \|I_l\| = 44.7242 \text{ A}$ , [which translates to](#)

$$\underline{u = -100e_2 + \frac{100}{11} \bigwedge_{i=1, i \neq 2}^{12} e_i + \frac{100}{13} \bigwedge_{i=1, i \neq 2}^{14} e_i} \quad (20)$$

[where the uncompensated current is 44.72 A](#). Figure [6a](#) shows the circuit with the distorted voltage source and the linear load, while Figure [6b](#) displays the compensator for this linear load. ~~This compensator design~~ [The compensator design by Castro-Núñez](#) reduced the source RMS current to ~~20.1008~~ [20.10 A](#) [\[22\]](#).



















- 410 40. Holland, J.H. *Adaptation in natural and artificial systems: an introductory analysis with applications to*  
411 *biology, control, and artificial intelligence*, 1975.
- 412 41. Mathworks. Genetic algorithm solver. MATLAB Global Optimization Toolbox, 2018.
- 413 42. Peng, F.Z.; Su, G.J.; Farquharson, G. A series LC filter for harmonic compensation of AC drives. *Power*  
414 *Electronics Specialists Conference*, 1999. PESC 99. 30th Annual IEEE. IEEE, 1999, Vol. 1, pp. 213–218.
- 415 43. Bartzsch, C.; Huang, H.; Roessel, R.; Sadek, K. Triple tuned harmonic filters-design principle and operating  
416 experience. *Power System Technology*, 2002. Proceedings. PowerCon 2002. International Conference on.  
417 IEEE, 2002, Vol. 1, pp. 542–546.

418 © 2019 by the authors. Submitted to *Energies* for possible open access publication under the terms and conditions  
419 of the Creative Commons Attribution (CC BY) license (<http://creativecommons.org/licenses/by/4.0/>).
